# Supplementary material for: Is daytime napping an effective strategy to improve sport-related cognitive and physical performance and reduce fatigue? A systematic review and meta-analysis of randomised controlled trials
Source: HighWire-hosted journal article supplement (doi:10.1136/bjsports-2022-106355), 2023-01-23

## SUPPLEMENTAL MATERIAL

---

### Is daytime napping an effective strategy to improve sport-related cognitive and physical performance and reduce perceived fatigue? A systematic review and meta-analysis of randomized controlled trials

---

|                                                                                                                                                                              |    |
|------------------------------------------------------------------------------------------------------------------------------------------------------------------------------|----|
| Table S1. PRISMA checklist ( <i>please see separate supplementary file "Table S1. PRISMA checklist"</i> ).                                                                   |    |
| Table S2. Search strategy (December 2, 2022) detailed for each database. ....                                                                                                | 2  |
| Table S3. Excluded studies by reason for exclusion (n = 68).....                                                                                                             | 3  |
| Table S4. Specific tests used in each study for each outcome analyzed.....                                                                                                   | 7  |
| Table S5. Analysis of the distribution of outcomes according to mean (x), standard deviation (sd) and x/sd ratio in the intervention (Nap) and control (No-nap) groups. .... | 9  |
| Table S6. Recommendations for future studies on the effect of daytime napping on sport performance and fatigue. ....                                                         | 13 |
| Figure S1. Risk of bias assessment. ....                                                                                                                                     | 14 |
| Figure S2. Publication bias in normal sleep. ....                                                                                                                            | 15 |
| Figure S3. Sensitivity analyses in normal sleep and partial sleep-deprived conditions. ....                                                                                  | 16 |
| Meta-Regression.....                                                                                                                                                         | 17 |
| Outcome: <b>Cognitive performance</b> .....                                                                                                                                  | 18 |
| Covariate: age (years) .....                                                                                                                                                 | 18 |
| Covariate: nap duration (min).....                                                                                                                                           | 19 |
| Covariate: time from nap awakening to test (min).....                                                                                                                        | 20 |
| Outcome: <b>Physical performance</b> .....                                                                                                                                   | 21 |
| Covariate: age (years) .....                                                                                                                                                 | 21 |
| Covariate: nap duration (min).....                                                                                                                                           | 22 |
| Covariate: time from nap awakening to test (min).....                                                                                                                        | 23 |
| Outcome: <b>Fatigue</b> .....                                                                                                                                                | 24 |
| Covariate: age (years) .....                                                                                                                                                 | 24 |
| Covariate: nap duration (min).....                                                                                                                                           | 25 |
| Covariate: time from nap awakening to test (min).....                                                                                                                        | 26 |

**Table S2. Search strategy (December 2, 2022) detailed for each database.**

|                                                                                                                                                                                                                                                                                                                                                                                                                                                                                                                                        |
|----------------------------------------------------------------------------------------------------------------------------------------------------------------------------------------------------------------------------------------------------------------------------------------------------------------------------------------------------------------------------------------------------------------------------------------------------------------------------------------------------------------------------------------|
| <b>PubMed:</b>                                                                                                                                                                                                                                                                                                                                                                                                                                                                                                                         |
| (napping OR siesta OR nap OR "nap sleep" OR "nap time" OR "day sleep" OR "daytime sleep" OR "daytime nap" OR "daytime napping" OR "day time sleep" OR "day time nap" OR "day time napping" OR "day-time sleep" OR "day-time nap" OR "day-time napping") AND (exercise OR "physical activity" OR fitness OR "physical performance" OR "sport performance" OR training OR "physical exercise" OR "athletic performance" OR fatigue OR exertion OR exhaustion)                                                                            |
| <b>Scopus:</b>                                                                                                                                                                                                                                                                                                                                                                                                                                                                                                                         |
| TITLE-ABS-KEY ( napping OR siesta OR nap OR "nap sleep" OR "nap time" OR "day sleep" OR "daytime sleep" OR "daytime nap" OR "daytime napping" OR "day time sleep" OR "day time nap" OR "day time napping" OR "day-time sleep" OR "day-time nap" OR "day-time napping" ) AND TITLE-ABS-KEY ( exercise OR "physical activity" OR fitness OR "physical performance" OR "sport performance" OR training OR "physical exercise" OR "athletic performance" OR fatigue OR exertion OR exhaustion)                                             |
| <b>Web of Science:</b>                                                                                                                                                                                                                                                                                                                                                                                                                                                                                                                 |
| TS=(napping OR siesta OR nap OR "nap sleep" OR "nap time" OR "day sleep" OR "daytime sleep" OR "daytime nap" OR "daytime napping" OR "day time sleep" OR "day time nap" OR "day time napping" OR "day-time sleep" OR "day-time nap" OR "day-time napping") AND TS=(exercise OR "physical activity" OR fitness OR "physical performance" OR "sport performance" OR training OR "physical exercise" OR "athletic performance" OR fatigue OR exertion OR exhaustion)                                                                      |
| <b>Cochrane CENTRAL:</b>                                                                                                                                                                                                                                                                                                                                                                                                                                                                                                               |
| ( napping OR siesta OR nap OR "nap sleep" OR "nap time" OR "day sleep" OR "daytime sleep" OR "daytime nap" OR "daytime napping" OR "day time sleep" OR "day time nap" OR "day time napping" OR "day-time sleep" OR "day-time nap" OR "day-time napping" ) AND ( exercise OR "physical activity" OR fitness OR "physical performance" OR "sport performance" OR training OR "physical exercise" OR "athletic performance" OR fatigue OR exertion OR exhaustion) <i>in Title Abstract Keyword - (Word variations have been searched)</i> |
| <b>SportDiscus:</b>                                                                                                                                                                                                                                                                                                                                                                                                                                                                                                                    |
| AB ( napping OR siesta OR nap OR "nap sleep" OR "nap time" OR "day sleep" OR "daytime sleep" OR "daytime nap" OR "daytime napping" OR "day time sleep" OR "day time nap" OR "day time napping" OR "day-time sleep" OR "day-time nap" OR "day-time napping" ) AND AB ( exercise OR "physical activity" OR fitness OR "physical performance" OR "sport performance" OR training OR "physical exercise" OR "athletic performance" OR fatigue OR exertion OR exhaustion)                                                                   |
| <b>PsycInfo:</b>                                                                                                                                                                                                                                                                                                                                                                                                                                                                                                                       |
| AB ( napping OR siesta OR nap OR "nap sleep" OR "nap time" OR "day sleep" OR "daytime sleep" OR "daytime nap" OR "daytime napping" OR "day time sleep" OR "day time nap" OR "day time napping" OR "day-time sleep" OR "day-time nap" OR "day-time napping" ) AND AB ( exercise OR "physical activity" OR fitness OR "physical performance" OR "sport performance" OR training OR "physical exercise" OR "athletic performance" OR fatigue OR exertion OR exhaustion)                                                                   |

**Table S3. Excluded studies by reason for exclusion (n = 68).**

| <b>Non stated physically active individuals (n = 18)</b>                                                                                                                                                                                                                 |
|--------------------------------------------------------------------------------------------------------------------------------------------------------------------------------------------------------------------------------------------------------------------------|
| 1. Albouy, G., et al., Daytime Sleep Enhances Consolidation of the Spatial but Not Motoric Representation of Motor Sequence Memory. <i>Plos One</i> , 2013. 8(1).                                                                                                        |
| 2. Amin, M.M., et al., The effects of a mid-day nap on the neurocognitive performance of first-year medical residents: a controlled interventional pilot study. <i>Acad Med</i> , 2012. 87(10): p. 1428-1433.                                                            |
| 3. Chang, H.J., et al., Association Between Nap and Reported Cognitive Function and Role of Sleep Debt: A Population-Based Study. <i>J Clin Neurol</i> , 2022. 18(4): p. 470-477.                                                                                        |
| 4. Du, J., et al., Planning Ability and Alertness After Nap Deprivation: Beneficial Effects of Acute Moderate-Intensity Aerobic Exercise Greater Than Sitting Naps. <i>Front Public Health</i> , 2022. 10: p. 861923-861923.                                             |
| 5. Fang, Z., et al., Differential Effects of a Nap on Motor Sequence Learning-Related Functional Connectivity Between Young and Older Adults. <i>Front Aging Neurosci</i> , 2021. 13: p. 747358-747358.                                                                  |
| 6. Fitzroy, A.B., et al., Encoding and consolidation of motor sequence learning in young and older adults. <i>Neurobiol Learn Mem</i> , 2021. 185: p. 107508-107508.                                                                                                     |
| 7. Korman, M., et al., Daytime sleep condenses the time course of motor memory consolidation. <i>Nat Neurosci</i> , 2007. 10(9): p. 1206-1213.                                                                                                                           |
| 8. Kubo, T., et al., Impact of nap length, nap timing and sleep quality on sustaining early morning performance. <i>Industrial Health</i> , 2007. 45(4): p. 552-563.                                                                                                     |
| 9. Mograss, M., et al., Exercising before a nap benefits memory better than napping or exercising alone. <i>Sleep</i> , 2020.                                                                                                                                            |
| 10. Monk, T.H., et al., Effects of afternoon "siesta" naps on sleep, alertness, performance, and circadian rhythms in the elderly. <i>Sleep</i> , 2001. 24(6): p. 680-687.                                                                                               |
| 11. Rosenbloom, T. and E.S. Grossman, Assessment of performance impairment after short naps with and without sleep inertia. <i>Transportation Research Part F: Traffic Psychology and Behaviour</i> , 2018. 52: p. 1-13.                                                 |
| 12. Tietzel, A.J. and L.C. Lack, The recuperative value of brief and ultra-brief naps on alertness and cognitive performance. <i>Journal of Sleep Research</i> , 2002. 11(3): p. 213-218.                                                                                |
| 13. Tucker, M.A., et al., A daytime nap containing solely non-REM sleep enhances declarative but not procedural memory. <i>Neurobiol Learn Mem</i> , 2006. 86(2): p. 241-247.                                                                                            |
| 14. Ukraintseva, Y.V. and V.B. Dorokhov, Effects of daytime sleep on the consolidation of declarative memory in humans. <i>Neuroscience and Behavioral Physiology</i> , 2012. 42(7): p. 700-706.                                                                         |
| 15. Wamsley, E.J., et al., A brief nap is beneficial for human route-learning: The role of navigation experience and EEG spectral power. <i>Learn Mem</i> , 2010. 17(7): p. 332-336.                                                                                     |
| 16. Watanabe, K., et al., Effects of 90 Min Napping on Fatigue and Associated Environmental Factors among Nurses Working Long Night Shifts: A Longitudinal Observational Study. <i>International Journal of Environmental Research and Public Health</i> , 2022. 19(15). |
| 17. Waterhouse, J., et al., The role of a short post-lunch nap in improving cognitive, motor, and sprint performance in participants with partial sleep deprivation. <i>J Sports Sci</i> , 2007. 25(14): p. 1557-1566.                                                   |
| 18. Woud, M.L., et al., Does napping enhance the effects of Cognitive Bias Modification-Appraisal training? An experimental study. <i>PLoS ONE</i> , 2018. 13(2): p. e0192837-e0192837.                                                                                  |
| <b>Reviews (n = 13)</b>                                                                                                                                                                                                                                                  |
| 1. Arakaki FH, Tufik S, Andersen ML. Naps and exercise: reinforcing a range of benefits for elderly health. 2019. p. 886-7.                                                                                                                                              |
| 2. Bonnar D, Bartel K, Kakoschke N, Lang C. Sleep Interventions Designed to Improve Athletic Performance and Recovery: A Systematic Review of Current Approaches. <i>Sports Med</i> 2018; <b>48</b> (3): 683-703.                                                        |
| 3. Botonis PG, Koutouvakis N, Toubekis AG. The impact of daytime napping on athletic performance - A narrative review. <i>Scand J Med Sci Sports</i> 2021; <b>31</b> (12): 2164-77.                                                                                      |
| 4. Dutheil F, Danini B, Bagheri R, et al. Effects of a Short Daytime Nap on the Cognitive Performance: A Systematic Review and Meta-Analysis. <i>Int J Environ Res Public Health</i> 2021; <b>18</b> (19).                                                               |

|                                                                                                                                                                                                                                                                             |
|-----------------------------------------------------------------------------------------------------------------------------------------------------------------------------------------------------------------------------------------------------------------------------|
| 5. Fullagar HHK, Duffield R, Skorski S, Coutts AJ, Julian R, Meyer T. Sleep and recovery in team sport: Current sleep-related issues facing professional team-sport athletes. <i>International Journal of Sports Physiology and Performance</i> 2015; <b>10</b> (8): 950-7. |
| 6. Gupta L, Morgan K, North C, Gilchrist S. Napping in high-performance athletes: Sleepiness or sleepability? <i>Eur J Sport Sci</i> 2021; <b>21</b> (3): 321-30.                                                                                                           |
| 7. Lastella M, Halson SL, Vitale JA, Memon AR, Vincent GE. To Nap or Not to Nap? A Systematic Review Evaluating Napping Behavior in Athletes and the Impact on Various Measures of Athletic Performance. <i>Nat Sci Sleep</i> 2021; <b>13</b> : 841-62.                     |
| 8. Nedelec M, Halson S, Abaidia A-EE, et al. Stress, Sleep and Recovery in Elite Soccer: A Critical Review of the Literature. <i>Sports Med</i> 2015; <b>45</b> (10): 1387-400.                                                                                             |
| 9. Nedelec M, Halson S, Delecroix B, et al. Sleep Hygiene and Recovery Strategies in Elite Soccer Players. <i>Sports Med</i> 2015; <b>45</b> (11): 1547-59.                                                                                                                 |
| 10. O'Donnell S, Beaven CM, Driller MW, O'donnell S, Beaven CM, Driller MW. From pillow to podium: a review on understanding sleep for elite athletes. <i>Nat Sci Sleep</i> 2018; <b>10</b> : 243-53.                                                                       |
| 11. Sargent C, Lastella M, Halson SL, Roach GD. The impact of training schedules on the sleep and fatigue of elite athletes. <i>Chronobiol Int</i> 2014; <b>31</b> (10): 1160-8.                                                                                            |
| 12. Souabni M, Hammouda O, Romdhani M, Trabelsi K, Ammar A, Driss T. Benefits of Daytime Napping Opportunity on Physical and Cognitive Performances in Physically Active Participants: A Systematic Review. <i>Sports Med</i> 2021.                                         |
| 13. Walsh NP, Halson SL, Sargent C, et al. Sleep and the athlete: Narrative review and 2021 expert consensus recommendations. <i>British Journal of Sports Medicine</i> 2021; <b>55</b> (7): 356-68.                                                                        |

**Study design (n = 9)**

|                                                                                                                                                                                                                                           |
|-------------------------------------------------------------------------------------------------------------------------------------------------------------------------------------------------------------------------------------------|
| 1. Knechtle, B., et al., No Improvement in Race Performance by Naps in Male Ultra-Endurance Cyclists in a 600-km Ultra-Cycling Race. <i>Chinese Journal of Physiology</i> , 2012. 55(2): p. 125-133.                                      |
| 2. Kong, L., Y. Cui, and Q. Gong. Duration of Daytime Napping Is Related to Physical Fitness among Chinese University Students. <i>Int J Environ Res Public Health</i> , 2022. 19(22).                                                    |
| 3. Lastella, M., et al., The impact of training load on sleep during a 14-day training camp in elite, adolescent, female basketball players. <i>International Journal of Sports Physiology and Performance</i> , 2020. 15(5): p. 724-730. |
| 4. Lubin, A., et al., Effects of exercise, bedrest and napping on performance decrement during 40 hours. <i>Psychophysiology</i> , 1976. 13(4): p. 334-339.                                                                               |
| 5. O'Donnell, S., C.M. Beaven, and M. Driller, The Influence of Match-Day Napping in Elite Female Netball Athletes. <i>Int J Sports Physiol Perform</i> , 2018. 13(9): p. 1143-1148.                                                      |
| 6. Pelka, M., et al., How Does a Short, Interrupted Recovery Break Affect Performance and How Is It Assessed? A Study on Acute Effects. <i>Int J Sports Physiol Perform</i> , 2017. 12(Suppl 2): p. S2114-s2121.                          |
| 7. Rachiwong, S. and B. Benjapalakorn, A 10-Minute Napping Can Help in Recovery in Motor Performance. <i>Journal of Exercise Physiology Online</i> , 2022. 25(3): p. 70-81.                                                               |
| 8. Wei, W. and W. Liu, Sleep Pattern Is Related to Mental Health among Chinese Collegiate Student Athletes. <i>Int J Environ Res Public Health</i> , 2022. 19(15).                                                                        |
| 9. Wilson, S.G. and J. Baker, Exploring the relationship between sleep and expertise in endurance sport athletes. <i>International Journal of Sport and Exercise Psychology</i> , 2021. 19(5): p. 866-881.                                |

**No data of interest (n = 8)**

|                                                                                                                                                                                                                                             |
|---------------------------------------------------------------------------------------------------------------------------------------------------------------------------------------------------------------------------------------------|
| 1. Ammar, A., et al., The effect of a daytime 60-min nap opportunity on postural control in highly active individuals. <i>Biol Sport</i> , 2021. 38(4): p. 683-691.                                                                         |
| 2. Calleja-González, J., et al., Recovery strategies for sports performance in the spanish professional basketball league (AcB). <i>Cultura, Ciencia y Deporte</i> , 2021. 16(49): p. 411-424.                                              |
| 3. Gattoni, C., et al., Sleep Deprivation Training to Reduce the Negative Effects of Sleep Loss on Endurance Performance: a Single Case Study. <i>International journal of sports physiology and performance</i> , 2022. 17(3): p. 499-503. |

|                                                                                                                                                                                                                                                                     |
|---------------------------------------------------------------------------------------------------------------------------------------------------------------------------------------------------------------------------------------------------------------------|
| 4. Keramidis, M.E., et al., A brief pre-exercise nap may alleviate physical performance impairments induced by short-term sustained operations with partial sleep deprivation—A field-based study. <i>Chronobiology International</i> , 2018. 35(10): p. 1464-1470. |
| 5. Peng, L., et al., Effects of Midday Nap Duration on Nighttime Sleep Quality in Elite Athletes. <i>Journal of Tianjin Institute of Sport / Tianjin Tiyu Xueyuan Xuebao</i> , 2018. 33(3): p. 224-229.                                                             |
| 6. Romdhani, M., et al., Total Sleep Deprivation and Recovery Sleep Affect the Diurnal Variation of Agility Performance: The Gender Differences. <i>Journal of strength and conditioning research</i> , 2021. 35(1): p. 132-140.                                    |
| 7. Romyn, G., et al., Daytime naps can be used to supplement night-time sleep in athletes. <i>Chronobiol Int</i> , 2018. 35(6): p. 865-868.                                                                                                                         |
| 8. Yagin, F.H., et al., A Thirty-Minute Nap Enhances Performance in Running-Based Anaerobic Sprint Tests during and after Ramadan Observance. <i>International journal of environmental research and public health</i> , 2022. 19(22).                              |

|                                                                                                                                                                                                                                     |
|-------------------------------------------------------------------------------------------------------------------------------------------------------------------------------------------------------------------------------------|
| <b>Participants younger than 18 years (n = 8)</b>                                                                                                                                                                                   |
| 1. Harris, A., et al., A Comparative Study of Sleep and Mood Between Young Elite Athletes and Age-Matched Controls. <i>J Phys Act Health</i> , 2017. 14(6): p. 465-473.                                                             |
| 2. Lolli, L., et al., An objective description of routine sleep habits in elite youth football players from the Middle-East. <i>Sleep Medicine</i> , 2021. 80: p. 96-99.                                                            |
| 3. Luke, A., et al., Sports-related injuries in youth athletes: is overscheduling a risk factor? <i>Clin J Sport Med</i> , 2011. 21(4): p. 307-314.                                                                                 |
| 4. Maier, J.G., et al., Brief periods of NREM sleep do not promote early offline gains but subsequent on-task performance in motor skill learning. <i>Neurobiology of Learning and Memory</i> , 2017. 145: p. 18-27.                |
| 5. Saito, K., et al., The effects of a short nap during the daytime on the athletic performance of elementary school basketball players. <i>Japanese Journal of Physical Fitness and Sports Medicine</i> , 2021. 70(3): p. 219-228. |
| 6. Suppiah, H.T., et al., Effects of a Short Daytime Nap on Shooting and Sprint Performance in High-Level Adolescent Athletes. <i>International Journal of Sports Physiology and Performance</i> , 2019. 14(1): p. 76-82.           |
| 7. Suppiah, H.T., et al., Sleep Characteristics of Elite Youth Athletes: A Clustering Approach to Optimize Sleep Support Strategies. <i>Int J Sports Physiol Perform</i> , 2021: p. 1-9.                                            |
| 8. 齊藤 訓英, et al., The effects of a short nap during the daytime on the athletic performance of elementary school basketball players. <i>Japanese Journal of Physical Fitness and Sports Medicine</i> , 2021. 70(3): p. 219-228.     |

|                                                                                                                                                                                                                |
|----------------------------------------------------------------------------------------------------------------------------------------------------------------------------------------------------------------|
| <b>Non eligible publications (n = 7)</b>                                                                                                                                                                       |
| 1. Ando, K., et al., Effects of Nap After Morning Exercise on Afternoon Performance and Overnight Sleep in Athletes. <i>Medicine and Science in Sports and Exercise</i> , 2019. 51(6): p. 752-752.             |
| 2. Driss, T., et al., Diurnal nap could enhance recovery process and counteract the negative effect of partial sleep deprivation on physical and cognitive performances. <i>Acta Physiologica</i> , 2021. 233. |
| 3. Petretta, A., et al., The Effect Of Nap Duration On Sleep Inertia, Muscle Strength, And 3-km Cycling Time Trial Performance. <i>Medicine and Science in Sports and Exercise</i> , 2020. 52(17): p. 501-501. |
| 4. Romyn, G., et al., SPRINT ABILITY AND REACTION TIME FOLLOWING A 2-HOUR NAP IN SOCCER PLAYERS. <i>Sleep</i> , 2017. 40: p. A71-A71.                                                                          |
| 5. Romyn, G., et al., Readiness To Perform, Sprint Ability, And Reaction Time Following A 2-hour Nap In Soccer Players. <i>Medicine and Science in Sports and Exercise</i> , 2017. 49(5): p. 570-570.          |
| 6. Tanabe, K., K. Nakazato, and S. Noi, NINETY-MINUTE RECOVERY NAP FOLLOWING AEROBIC EXERCISE IMPROVES EXECUTIVE FUNCTION IN MALE COLLEGIATE STUDENTS. <i>Sleep</i> , 2019. 42.                                |
| 7. Willmer, F., et al., Napping improves wakefulness in athletes but has less influence on endurance performance. <i>Sleep medicine</i> , 2022. 31: p. S181–S181-.                                             |

|                                                                                                                                                                                    |
|------------------------------------------------------------------------------------------------------------------------------------------------------------------------------------|
| <b>Duplicated data from other study (n = 5)</b>                                                                                                                                    |
| 1. Boukhris, O., et al., Performance, muscle damage, and inflammatory responses to repeated high-intensity exercise following a 40-min nap. <i>Res Sports Med</i> , 2021: p. 1-18. |

|                                                                                                                                                                                                                                           |
|-------------------------------------------------------------------------------------------------------------------------------------------------------------------------------------------------------------------------------------------|
| 2. Boukhris, O., et al., Physiological response and physical performance after 40 min and 90 min daytime nap opportunities. <i>Res Sports Med</i> , 2022: p. 1-14.                                                                        |
| 3. Romdhani, M., et al., The Effect of Experimental Recuperative and Appetitive Post-lunch Nap Opportunities, With or Without Caffeine, on Mood and Reaction Time in Highly Trained Athletes. <i>Front Psychol</i> , 2021. 12: p. 720493. |
| 4. Romdhani, M., et al., The effect of caffeine, nap opportunity and their combination on biomarkers of muscle damage and antioxidant defence during repeated sprint exercise. <i>Biology of Sport</i> , 2022. 39(4): p. 1033-1042.       |
| 5. Romdhani, M., et al., Caffeine Use or Napping to Enhance Repeated Sprint Performance After Partial Sleep Deprivation: Why Not Both? <i>Int J Sports Physiol Perform</i> , 2021. 16(5): p. 711-718.                                     |

**Table S4. Specific tests used in each study for each outcome analyzed.**

| Authors, Year            | Cognitive Performance                                                                                                                                                                                                     | Physical Performance                                                                                       | Fatigue                                 |
|--------------------------|---------------------------------------------------------------------------------------------------------------------------------------------------------------------------------------------------------------------------|------------------------------------------------------------------------------------------------------------|-----------------------------------------|
| Abdessalem et al., 2019  | Digit cancellation test                                                                                                                                                                                                   | 5 m shuttle run test [to determine best distance (BD), total distance (TD)]                                | Rating of perceived exertion (RPE)      |
| Ajjimaporn et al., 2020  | Auditory reaction time                                                                                                                                                                                                    | Running-based Anaerobic Sprint Test (RAST), Isometric leg strength test                                    | RPE                                     |
| Blanchfield et al., 2018 | None                                                                                                                                                                                                                      | Endurance performance: Time to exhaustion (TTE) at 90% $\dot{V}O_2$ max                                    | Brunel Mood Scale (BRUMS), item fatigue |
| Boukhris et al., 2019    | None                                                                                                                                                                                                                      | 5 m shuttle run test [to determine best distance (BD), total distance (TD)]                                | RPE and Fatigue index                   |
| Boukhris et al., 2020    | Digit cancellation test                                                                                                                                                                                                   | 5-m shuttle run test (BD and TD), and the maximal voluntary isometric contraction (MVIC) test              | RPE and Fatigue index                   |
| Boukhris et al., 2022    | None                                                                                                                                                                                                                      | 5 m shuttle run test [to determine great distance (GD), total distance (TD)]                               | RPE and Fatigue index                   |
| Brotherton et al., 2018  | Alertness                                                                                                                                                                                                                 | Submaximal weightlifting performance (one-repetition maximum (1RM) for bench press and inclined leg press) | RPE, tiredness                          |
| Daaloul et al., 2018     | Alertness, simple reaction time, mental rotation test and lower reaction test                                                                                                                                             | Squat jump (SJ), counter movement jump (CMJ), KST                                                          | Fatigue (0-100 VAS)                     |
| Hammouda et al., 2018    | None                                                                                                                                                                                                                      | Running-based anaerobic sprint test                                                                        | Fatigue index (results unavailable)     |
| Hsouna et al., 2019      | Digit cancellation test                                                                                                                                                                                                   | 5-jump test                                                                                                | The Hooper questionnaire                |
| Hsouna et al., 2020a     | Digit cancellation test                                                                                                                                                                                                   | 5 m shuttle run test                                                                                       | RPE                                     |
| Hsouna et al., 2020b     | Digit cancellation test                                                                                                                                                                                                   | 5 m shuttle run test                                                                                       | RPE                                     |
| Hsouna et al., 2022      | None                                                                                                                                                                                                                      | 5 m shuttle run test                                                                                       | RPE                                     |
| Petit et al., 2014       | None                                                                                                                                                                                                                      | Wingate test                                                                                               | Fatigue index                           |
| Petit et al., 2018       | P300, an Auditory Event-related potentials (ERP), subjective alertness (VAS) and an Attentional Performance (TAP-M): alertness, divided attention, sustained attention, visual scanning, flexibility and distractibility) | None                                                                                                       | None                                    |
| Romdhani et al., 2020    | Simple reaction time, Multi-choice reaction time                                                                                                                                                                          | Running-Based Anaerobic Sprint Test (RAST)                                                                 | RPE and Fatigue index                   |
| Romdhani et al., 2021    | Multi-choice reaction time (s)                                                                                                                                                                                            | Running-Based Anaerobic Sprint Test (RAST)                                                                 | None                                    |
| Romyn et al., 2022       | Response time                                                                                                                                                                                                             | 3-m split, 5-m split, 10-m print, agility                                                                  | Perceived exertion                      |

|                            |                                                                         |                                                                                               |                       |
|----------------------------|-------------------------------------------------------------------------|-----------------------------------------------------------------------------------------------|-----------------------|
| Souabni et al., 2022       | None                                                                    | Defensive (DA) and offensive (OA) agility, upper body power (UBP), Shooting skills test (SST) | RPE and Fatigue index |
| Souissi et al., 2020       | Simple reaction time                                                    | 5-m shuttle run test                                                                          | Fatigue index         |
| Tanabe et al. 2018         | Simple reaction time, Multi-choice reaction time, Modified flanker task | Grip strength (right and left hands), Back strength, Wingate test (mean and peak power)       | None                  |
| Yamamoto and Hayashi, 2006 | None                                                                    | Exercise duration                                                                             | RPE                   |



**Table S5. Analysis of the distribution of outcomes according to mean (x), standard deviation (sd) and x/sd ratio in the intervention (Nap) and control (No-nap) groups.**

| Reference                  | Sample size | Nap duration | Outcome | Test  | x-Nap   | sd-Nap | x-sd-Nap ratio | x-No-nap | sd-No-nap | x-sd-No-nap ratio |
|----------------------------|-------------|--------------|---------|-------|---------|--------|----------------|----------|-----------|-------------------|
| Romdhani et al, 2021       | 14          | 20 min       | COGN    | MCRT  |         |        | ***            |          |           | ***               |
| Abdessalem et al, 2019     | 18          | 25 min       | COGN    | NCORR | 69.00   | 11.00  | 6.27           | 65.00    | 9.00      | 7.22              |
| Hsouna et al, 2019         | 20          | 25 min       | COGN    | NCR   | 67.80   | 3.30   | 20.55          | 65.00    | 3.20      | 20.31             |
| Hsouna et al, 2020a        | 12          | 25 min       | COGN    | DCT   | 65.60   | 11.40  | 5.75           | 65.80    | 10.00     | 6.58              |
| Daaloul et al, 2019        | 13          | 30 min       | COGN    | ALERT | 7.10    | 1.30   | 5.46           | 5.60     | 2.20      | 2.55              |
| Daaloul et al, 2019        | 13          | 30 min       | COGN    | SRT   | 278.70  | 24.90  | 11.19          | 21.00    | 8.00      | 2.63              |
| Daaloul et al, 2019        | 13          | 30 min       | COGN    | MRT   | 21.00   | 8.00   | 2.63           | 20.80    | 8.40      | 2.48              |
| Soussi et al, 2020         | 14          | 30 min       | COGN    | VIGIL | 71.50   | 1.10   | 65.00          | 68.60    | 1.00      | 68.60             |
| Soussi et al, 2020         | 14          | 30 min       | COGN    | REACT | 0.31    | 0.01   | 61.00          | 0.28     | 0.01      | 46.33             |
| Tanabe et al, 2020         | 7           | 30 min       | COGN    | SRT   | 307.40  | 21.90  | 14.04          | 283.00   | 14.90     | 18.99             |
| Tanabe et al, 2020         | 7           | 30 min       | COGN    | MRT   | 381.10  | 43.20  | 8.82           | 348.00   | 24.60     | 14.15             |
| Hsouna et al, 2019         | 20          | 35 min       | COGN    | NCR   | 69.80   | 3.30   | 21.15          | 65.00    | 3.20      | 20.31             |
| Hsouna et al, 2020b        | 14          | 35 min       | COGN    | ATTS  | 67.64   | 2.78   | 24.33          | 64.50    | 2.52      | 25.60             |
| Boukhris et al, 2020       | 14          | 40 min       | COGN    | ATTS  | 85.00   | 12.00  | 7.08           | 79.00    | 11.00     | 7.18              |
| Boukhris et al, 2020       | 14          | 40 min       | COGN    | MVIC  | 812.00  | 100.00 | 8.12           | 769.00   | 94.00     | 8.18              |
| Hsouna et al, 2019         | 20          | 45 min       | COGN    | NCR   | 71.00   | 3.50   | 20.29          | 65.00    | 3.20      | 20.31             |
| Romyn et al, 2022          | 12          | 60 min       | COGN    | RESPT | 224.00  | 28.28  | 7.92           | 217.00   | 17.67     | 12.28             |
| Tanabe et al, 2020         | 7           | 60 min       | COGN    | SRT   | 307.40  | 21.90  | 14.04          | 284.80   | 7.60      | 37.47             |
| Tanabe et al, 2020         | 7           | 60 min       | COGN    | MRT   | 381.10  | 43.20  | 8.82           | 365.90   | 14.30     | 25.59             |
| Boukhris et al, 2020       | 14          | 90 min       | COGN    | ATTS  | 87.00   | 13.00  | 6.69           | 79.00    | 11.00     | 7.18              |
| Boukhris et al, 2020       | 14          | 90 min       | COGN    | MVIC  | 843.00  | 102.00 | 8.26           | 769.00   | 94.00     | 8.18              |
| Romdhani et al, 2021       | 14          | 90 min       | COGN    | MCRT  |         |        | ***            |          |           | ***               |
| Tanabe et al, 2020         | 7           | 90 min       | COGN    | SRT   | 307.40  | 21.90  | 14.04          | 289.70   | 14.30     | 20.26             |
| Tanabe et al, 2020         | 7           | 90 min       | COGN    | MRT   | 381.10  | 43.20  | 8.82           | 353.10   | 24.70     | 14.30             |
| Romyn et al, 2022          | 12          | 120 min      | COGN    | RESPT | 202.00  | 22.98  | 8.79           | 217.00   | 17.67     | 12.28             |
| Yamamoto and Hayashi, 2006 | 10          | 10 min       | PHYS    | EXDUR | 1013.00 | 108.00 | 9.38           | 986.00   | 104.00    | 9.48              |
| Blanchfield et al, 2018    | 11          | 20 min       | PHYS    | RTTE  | 596.00  | 148.00 | 4.03           | 589.00   | 216.00    | 2.73              |
| Petit et al, 2014          | 16          | 20 min       | PHYS    | PP    | 1023.34 | 210.90 | 4.85           | 1014.44  | 161.30    | 6.29              |
| Petit et al, 2014          | 16          | 20 min       | PHYS    | MP    | 713.36  | 110.10 | 6.48           | 708.86   | 93.20     | 7.61              |
| Romdhani et al, 2021       | 14          | 20 min       | PHYS    | PMAX  |         |        | ***            |          |           | ***               |
| Romdhani et al, 2021       | 14          | 20 min       | PHYS    | PMEAN |         |        | ***            |          |           | ***               |
| Abdessalem et al, 2019     | 18          | 25 min       | PHYS    | TD    | 724.00  | 62.00  | 11.68          | 697.00   | 74.00     | 9.42              |
| Abdessalem et al, 2019     | 18          | 25 min       | PHYS    | HD    | 134.00  | 14.00  | 9.57           | 126.00   | 14.00     | 9.00              |
| Boukhris et al, 2019       | 17          | 25 min       | PHYS    | BD    | 134.10  | 13.40  | 10.01          | 126.40   | 13.60     | 9.29              |

|                      |    |        |      |        |        |        |        |        |       |        |
|----------------------|----|--------|------|--------|--------|--------|--------|--------|-------|--------|
| Boukhris et al, 2019 | 17 | 25 min | PHYS | TD     | 719.90 | 65.50  | 10.99  | 697.10 | 74.10 | 9.41   |
| Boukhris et al, 2022 | 15 | 25 min | PHYS | GD     | 135.00 | 3.00   | 45.00  | 126.00 | 3.00  | 42.00  |
| Boukhris et al, 2022 | 15 | 25 min | PHYS | TD     | 720.00 | 18.00  | 40.00  | 694.00 | 20.00 | 34.70  |
| Hsouna et al, 2019   | 20 | 25 min | PHYS | AS5JT  | 2.74   | 0.04   | 68.50  | 2.67   | 0.05  | 53.40  |
| Hsouna et al, 2020a  | 12 | 25 min | PHYS | TD     | 736.00 | 16.00  | 46.00  | 718.00 | 15.00 | 47.87  |
| Hsouna et al, 2020a  | 12 | 25 min | PHYS | BD     | 135.00 | 4.00   | 33.75  | 130.00 | 3.00  | 43.33  |
| Daaloul et al, 2019  | 13 | 30 min | PHYS | SJ     | 39.00  | 5.20   | 7.50   | 39.60  | 4.40  | 9.00   |
| Daaloul et al, 2019  | 13 | 30 min | PHYS | CMJ    | 42.30  | 5.20   | 8.13   | 42.70  | 4.20  | 10.17  |
| Soussi et al, 2020   | 14 | 30 min | PHYS | TD     | 747.00 | 3.00   | 249.00 | 743.00 | 3.00  | 247.67 |
| Soussi et al, 2020   | 14 | 30 min | PHYS | PD     | 142.60 | 1.50   | 95.07  | 139.10 | 1.50  | 92.73  |
| Tanabe et al, 2020   | 7  | 30 min | PHYS | GSRH   | 47.10  | 7.30   | 6.45   | 47.10  | 5.80  | 8.12   |
| Tanabe et al, 2020   | 7  | 30 min | PHYS | GSLH   | 43.70  | 5.50   | 7.95   | 44.60  | 7.00  | 6.37   |
| Tanabe et al, 2020   | 7  | 30 min | PHYS | BS     | 143.50 | 28.30  | 5.07   | 141.40 | 26.90 | 5.26   |
| Tanabe et al, 2020   | 7  | 30 min | PHYS | WTMP   | 634.90 | 96.60  | 6.57   | 625.00 | 76.70 | 8.15   |
| Tanabe et al, 2020   | 7  | 30 min | PHYS | WTTP   | 841.90 | 139.60 | 6.03   | 816.60 | 91.10 | 8.96   |
| Boukhris et al, 2019 | 17 | 35 min | PHYS | BD     | 131.10 | 7.80   | 16.81  | 126.40 | 13.60 | 9.29   |
| Boukhris et al, 2019 | 17 | 35 min | PHYS | TD     | 720.50 | 52.20  | 13.80  | 697.10 | 74.10 | 9.41   |
| Hsouna et al, 2019   | 20 | 35 min | PHYS | AS5JT  | 2.77   | 0.05   | 55.40  | 2.67   | 0.05  | 53.40  |
| Hsouna et al, 2020b  | 14 | 35 min | PHYS | TD     | 718.00 | 14.00  | 51.29  | 684.00 | 20.00 | 34.20  |
| Hsouna et al, 2020b  | 14 | 35 min | PHYS | BD     | 129.00 | 2.00   | 64.50  | 124.00 | 3.00  | 41.33  |
| Boukhris et al, 2020 | 14 | 40 min | PHYS | HD     | 139.00 | 11.00  | 12.64  | 129.00 | 6.00  | 21.50  |
| Boukhris et al, 2020 | 14 | 40 min | PHYS | TD     | 759.00 | 71.00  | 10.69  | 704.00 | 37.00 | 19.03  |
| Hsouna et al, 2022   | 12 | 40 min | PHYS | TD     | 702.00 | 11.00  | 63.82  | 640.00 | 10.00 | 64.00  |
| Hsouna et al, 2022   | 12 | 40 min | PHYS | BD     | 126.00 | 1.00   | 126.00 | 116.00 | 2.00  | 58.00  |
| Souabni et al, 2022  | 12 | 40 min | PHYS | DA     | 5.62   | 0.06   | 93.67  | 6.00   | 0.04  | 150.00 |
| Souabni et al, 2022  | 12 | 40 min | PHYS | OA     | 8.48   | 0.08   | 106.00 | 8.72   | 0.14  | 62.29  |
| Souabni et al, 2022  | 12 | 40 min | PHYS | UBP    | 6.91   | 0.25   | 27.64  | 6.52   | 0.23  | 28.35  |
| Souabni et al, 2022  | 12 | 40 min | PHYS | SST    | 87.00  | 9.00   | 9.67   | 86.00  | 10.00 | 8.60   |
| Boukhris et al, 2019 | 17 | 45 min | PHYS | BD     | 139.60 | 15.90  | 8.78   | 126.40 | 13.60 | 9.29   |
| Boukhris et al, 2019 | 17 | 45 min | PHYS | TD     | 755.10 | 63.30  | 11.93  | 697.10 | 74.10 | 9.41   |
| Boukhris et al, 2022 | 15 | 45 min | PHYS | GD     | 140.00 | 4.00   | 35.00  | 126.00 | 3.00  | 42.00  |
| Boukhris et al, 2022 | 15 | 45 min | PHYS | TD     | 758.00 | 14.00  | 54.14  | 694.00 | 20.00 | 34.70  |
| Hsouna et al, 2019   | 20 | 45 min | PHYS | AS5JT  | 2.78   | 0.06   | 46.33  | 2.67   | 0.05  | 53.40  |
| Romyn et al, 2022    | 12 | 60 min | PHYS | 3MSPL  | 0.83   | 0.09   | 9.22   | 0.81   | 0.08  | 10.13  |
| Romyn et al, 2022    | 12 | 60 min | PHYS | 5MSPL  | 1.18   | 0.09   | 13.11  | 1.18   | 0.07  | 16.86  |
| Romyn et al, 2022    | 12 | 60 min | PHYS | 10MSPL | 1.98   | 0.08   | 24.75  | 1.97   | 0.09  | 21.89  |
| Romyn et al, 2022    | 12 | 60 min | PHYS | AGYL   | 2.45   | 0.11   | 22.27  | 2.47   | 0.11  | 22.45  |
| Tanabe et al, 2020   | 7  | 60 min | PHYS | GSRH   | 47.40  | 7.60   | 6.24   | 47.10  | 5.80  | 8.12   |

|                            |    |         |      |        |        |        |       |        |       |       |
|----------------------------|----|---------|------|--------|--------|--------|-------|--------|-------|-------|
| Tanabe et al, 2020         | 7  | 60 min  | PHYS | GSLH   | 43.20  | 5.80   | 7.45  | 44.60  | 7.00  | 6.37  |
| Tanabe et al, 2020         | 7  | 60 min  | PHYS | BS     | 142.90 | 24.70  | 5.79  | 141.40 | 26.90 | 5.26  |
| Tanabe et al, 2020         | 7  | 60 min  | PHYS | WTMP   | 625.90 | 65.90  | 9.50  | 625.00 | 76.70 | 8.15  |
| Tanabe et al, 2020         | 7  | 60 min  | PHYS | WTTP   | 817.30 | 97.10  | 8.42  | 816.60 | 91.10 | 8.96  |
| Boukhris et al, 2020       | 14 | 90 min  | PHYS | HD     | 142.00 | 13.00  | 10.92 | 129.00 | 6.00  | 21.50 |
| Boukhris et al, 2020       | 14 | 90 min  | PHYS | TD     | 793.00 | 64.00  | 12.39 | 704.00 | 37.00 | 19.03 |
| Romdhani et al, 2021       | 14 | 90 min  | PHYS | PMAX   |        |        | ***   |        |       | ***   |
| Romdhani et al, 2021       | 14 | 90 min  | PHYS | PMEAN  |        |        | ***   |        |       | ***   |
| Tanabe et al, 2020         | 7  | 90 min  | PHYS | GSRH   | 48.40  | 6.30   | 7.68  | 47.10  | 5.80  | 8.12  |
| Tanabe et al, 2020         | 7  | 90 min  | PHYS | GSLH   | 45.40  | 5.10   | 8.90  | 44.60  | 7.00  | 6.37  |
| Tanabe et al, 2020         | 7  | 90 min  | PHYS | BS     | 150.00 | 27.70  | 5.42  | 141.40 | 26.90 | 5.26  |
| Tanabe et al, 2020         | 7  | 90 min  | PHYS | WTMP   | 628.10 | 69.00  | 9.10  | 625.00 | 76.70 | 8.15  |
| Tanabe et al, 2020         | 7  | 90 min  | PHYS | WTTP   | 831.90 | 105.80 | 7.86  | 816.60 | 91.10 | 8.96  |
| Romyn et al, 2022          | 12 | 120 min | PHYS | 3MSPL  | 0.82   | 0.07   | 11.71 | 0.81   | 0.08  | 10.13 |
| Romyn et al, 2022          | 12 | 120 min | PHYS | 5MSPL  | 1.20   | 0.08   | 15.00 | 1.18   | 0.07  | 16.86 |
| Romyn et al, 2022          | 12 | 120 min | PHYS | 10MSPL | 1.99   | 0.08   | 24.88 | 1.97   | 0.09  | 21.89 |
| Romyn et al, 2022          | 12 | 120 min | PHYS | AGYL   | 2.48   | 0.11   | 22.55 | 2.47   | 0.11  | 22.45 |
| Yamamoto and Hayashi, 2006 | 10 | 10 min  | FATG | RPE    | 15.40  | 1.00   | 15.40 | 17.20  | 0.60  | 28.67 |
| Blanchfield et al, 2018    | 11 | 20 min  | FATG | FATGB  | 2.80   | 1.80   | 1.56  | 2.20   | 1.90  | 1.16  |
| Petit et al, 2014          | 16 | 20 min  | FATG | FI     | 53.96  | 8.70   | 6.20  | 53.92  | 7.40  | 7.29  |
| Abdessalem et al, 2019     | 18 | 25 min  | FATG | RPE    | 4.40   | 1.60   | 2.75  | 4.70   | 1.20  | 3.92  |
| Boukhris et al, 2019       | 17 | 25 min  | FATG | FI     | 13.30  | 6.00   | 2.22  | 11.70  | 3.20  | 3.66  |
| Boukhris et al, 2019       | 17 | 25 min  | FATG | RPE    | 4.80   | 1.50   | 3.20  | 4.60   | 1.10  | 4.18  |
| Boukhris et al, 2022       | 15 | 25 min  | FATG | FI     | 13.40  | 1.60   | 8.38  | 11.90  | 0.90  | 13.22 |
| Boukhris et al, 2022       | 15 | 25 min  | FATG | RPE    | 5.00   | 0.30   | 16.67 | 4.70   | 0.30  | 15.67 |
| Hsouna et al, 2019         | 20 | 25 min  | FATG | FATG   | 4.05   | 0.20   | 20.25 | 4.50   | 0.30  | 15.00 |
| Hsouna et al, 2020a        | 12 | 25 min  | FATG | FI     | 12.30  | 1.40   | 8.79  | 11.20  | 0.90  | 12.44 |
| Hsouna et al, 2020a        | 12 | 25 min  | FATG | RPE    | 4.83   | 1.31   | 3.69  | 4.54   | 0.73  | 6.22  |
| Daaloul et al, 2019        | 13 | 30 min  | FATG | FATG   | 4.10   | 1.20   | 3.42  | 4.40   | 0.80  | 5.50  |
| Soussi et al, 2020         | 14 | 30 min  | FATG | FI     | 11.00  | 0.90   | 12.22 | 14.00  | 0.60  | 23.33 |
| Boukhris et al, 2019       | 17 | 35 min  | FATG | FATG   | 10.50  | 5.80   | 1.81* | 11.70  | 3.20  | 3.66  |
| Boukhris et al, 2019       | 17 | 35 min  | FATG | RPE    | 4.60   | 1.20   | 3.83  | 4.60   | 1.10  | 4.18  |
| Hsouna et al, 2019         | 20 | 35 min  | FATG | FATG   | 3.95   | 0.28   | 14.11 | 4.50   | 0.30  | 15.00 |
| Hsouna et al, 2020b        | 14 | 35 min  | FATG | FI     | 10.40  | 1.60   | 6.50  | 11.70  | 0.90  | 13.00 |
| Hsouna et al, 2020b        | 14 | 35 min  | FATG | RPE    | 4.22   | 0.18   | 23.44 | 4.59   | 0.28  | 16.39 |
| Boukhris et al, 2020       | 14 | 40 min  | FATG | FI     | 12.00  | 4.00   | 3.00  | 15.00  | 4.00  | 3.75  |
| Hsouna et al, 2022         | 12 | 40 min  | FATG | FI     | 13.60  | 1.60   | 8.50  | 15.00  | 1.40  | 10.71 |
| Hsouna et al, 2022         | 12 | 40 min  | FATG | RPE    | 4.62   | 0.17   | 27.18 | 5.65   | 0.19  | 29.74 |

|                      |    |         |      |       |       |      |        |       |      |        |
|----------------------|----|---------|------|-------|-------|------|--------|-------|------|--------|
| Souabni et al, 2022  | 12 | 40 min  | FATG | FATG  | 1.00  | 1.54 | 0.65** | 0.50  | 1.34 | 0.37** |
| Souabni et al, 2022  | 12 | 40 min  | FATG | RPE   | 10.30 | 1.30 | 7.92   | 11.00 | 2.00 | 5.50   |
| Boukhris et al, 2019 | 17 | 45 min  | FATG | FI    | 10.80 | 2.40 | 4.50   | 11.70 | 3.20 | 3.66   |
| Boukhris et al, 2019 | 17 | 45 min  | FATG | RPE   | 3.70  | 1.10 | 3.36   | 4.60  | 1.10 | 4.18   |
| Boukhris et al, 2022 | 15 | 45 min  | FATG | FI    | 10.70 | 0.60 | 17.83  | 11.90 | 0.90 | 13.22  |
| Boukhris et al, 2022 | 15 | 45 min  | FATG | RPE   | 3.90  | 0.30 | 13.00  | 4.70  | 0.30 | 15.67  |
| Hsouana et al, 2019  | 20 | 45 min  | FATG | FATG  | 3.30  | 0.33 | 10.00  | 4.50  | 0.30 | 15.00  |
| Romyn et al, 2022    | 12 | 60 min  | FATG | PEREX | 12.00 | 2.30 | 5.22   | 11.20 | 2.30 | 4.87   |
| Boukhris et al, 2020 | 14 | 90 min  | FATG | FI    | 10.00 | 3.00 | 3.33   | 15.00 | 4.00 | 3.75   |
| Romyn et al, 2022    | 12 | 120 min | FATG | PEREX | 13.20 | 1.94 | 6.80   | 11.20 | 2.30 | 4.87   |

\*Boukhris et al, 2019: FI: The Shapiro–Wilk test revealed that sleep quality, RPE, FI, and BD data were normally distributed.

\*\*Souabni et al, 2022: FATG: The Shapiro–Wilk W-test revealed that ESS, RPE, HR mean, HR peak, SST, Hooper’s fatigue and total score were normally distributed.

\*\*\*Romdhani et al, 2021: The Shapiro–Wilks revealed that data were normally distributed. The authors directly reported the MD (95% CI) between the N20 or N90 and No-Nap groups.

**Table S6. Recommendations for future studies on the effect of daytime napping on sport performance and fatigue.**

| Study Characteristic                | Recommendations                                                                                                                                                                                                                                                                                                                                                                                                                                                                                                                                                                                                                                                                                                                                                                                                                                                                                                                                                                                                             |
|-------------------------------------|-----------------------------------------------------------------------------------------------------------------------------------------------------------------------------------------------------------------------------------------------------------------------------------------------------------------------------------------------------------------------------------------------------------------------------------------------------------------------------------------------------------------------------------------------------------------------------------------------------------------------------------------------------------------------------------------------------------------------------------------------------------------------------------------------------------------------------------------------------------------------------------------------------------------------------------------------------------------------------------------------------------------------------|
| <b>Population</b>                   | Considering gender differences in sleep, <sup>1</sup> in addition to the age-related physiological changes for both sleep and sports practice, <sup>2,3</sup> it is essential to conduct studies in both genders and at older ages. Furthermore, although sample size calculations were presented in most of the studies, the sample sizes were generally small (between 7 and 20 participants), which has led to an increase in the measures of dispersion (i.e., compatibility interval, standard deviation) and small sample bias. <sup>4</sup> Therefore, it is recommended to use more conservative parameters for sample size calculation, such as those found in the results of this review, ensuring an increase in the statistical power to detect differences. This is particularly important in studies with professional athletes, in whose margin of improvement in sports performance is minimal.                                                                                                             |
| <b>Exposure (napping)</b>           | Future studies on this topic should use PSG to assess napping, the gold-standard method for sleep assessment. This would be useful not only to confirm that the participant has slept but also to assess the architecture of the sleep period. <sup>5</sup> In addition, both the timing of the nap (or of the activities in the control group) and its duration are parameters to be noted. The optimal time to assess napping seems to be after lunch and the sports activities in the afternoon or evening. Although the usual time of the available studies was at 2 p.m., it is not reasonable to fix this time as a recommendation because lunch time can vary according to cultural, labor and geographical aspects. Regarding nap duration, it is recommended to evaluate at least two different durations so that it can be assessed whether there is a dose—response effect, in addition to a ceiling effect (i.e., a limit from which to increase the duration of the nap does not lead to additional benefits). |
| <b>Outcomes (sport performance)</b> | In addition to considering the most appropriate tests for this purpose in each sport modality, it would be useful for future meta-analyses to also measure performance according to frequently used tests, such as the 5-m shuttle run test for physical performance, the digital cancellation test to measure cognitive performance, and the fatigue index to measure perceived fatigue. Specifically, this would allow calculation of the nonstandardized effect of napping on each of these indicators of sports performance, so that more easily interpretable and practically applicable measures would be available.                                                                                                                                                                                                                                                                                                                                                                                                  |
| <b>Study design</b>                 | The crossover controlled clinical trial with randomization of intervention (nap, no nap) has been the most commonly used design thus far, with a washout time ranging from 1 to 7 days. Considering that circadian rhythm dynamics, sleep needs and sports training rhythm may vary according to the day of the week, a 7-day washout time is recommended in order to minimize the impact of these variations on the results. On the other hand, considering what was observed in the meta-regression on the effect of the time between the awakening from the nap and the sports activity on the results, it seems that 60 minutes is the minimum time necessary to overcome the feeling of sleep inertia before the test.                                                                                                                                                                                                                                                                                                 |
| <b>Other recommendations</b>        | Despite the increase in costs and methodological complexity, repeating the two phases of the experiment once or twice with the same participants would make it possible to control the effect of intraindividual variability, enhancing the robustness of the findings. Finally, considering the predominance of studies coming from the same country, Tunisia, it is also advisable to carry out studies on this subject in other countries with different geographical positions, habits and customs to broaden and reinforce the generalization of the findings.                                                                                                                                                                                                                                                                                                                                                                                                                                                         |

**References cited in this table:** (1) Krishnan V, Collop NA. Gender differences in sleep disorders. *Curr Opin Pulm Med* 2006;12(6):383-9. (2) Cameron AFM, Perera N, Fulcher M. Professional Athletes Have Poorer Sleep Quality and Sleep Hygiene Compared With an Age-Matched Cohort. *Clin J Sport Med* 2021;31(6):488-493. (3) Mander BA, Winer JR, Walker MP. Sleep and Human Aging. *Neuron* 2017;94(1):19-36. (4) Lin L. Bias caused by sampling error in meta-analysis with small sample sizes. *PLoS One* 2018;13(9):e0204056. (5) Rundo JV, Downey R, 3rd. Polysomnography. *Handb Clin Neurol* 2019;160:381-392.

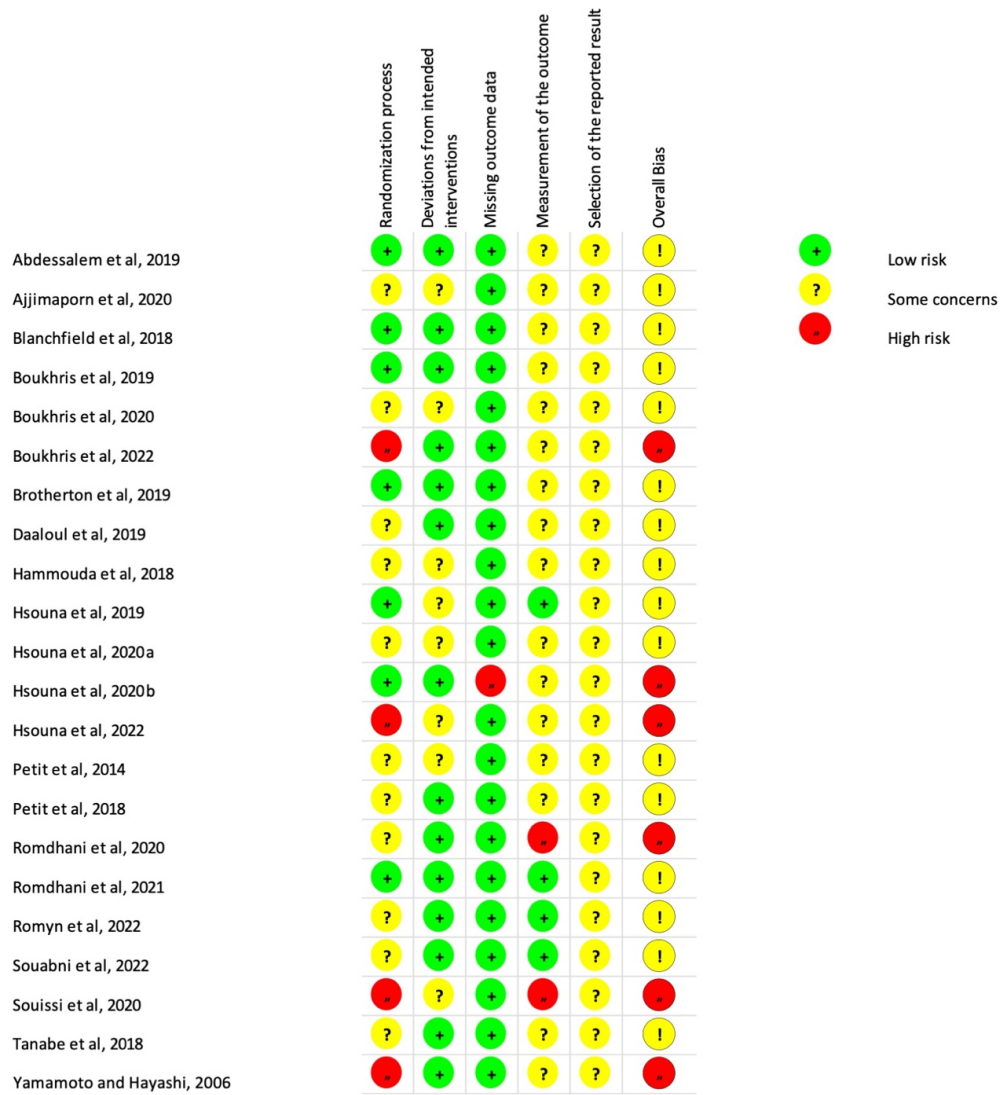

Figure S1. Risk of bias assessment.

Cognitive performance

Normal Sleep

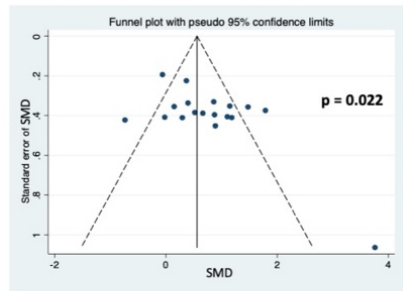

Physical performance

Normal Sleep

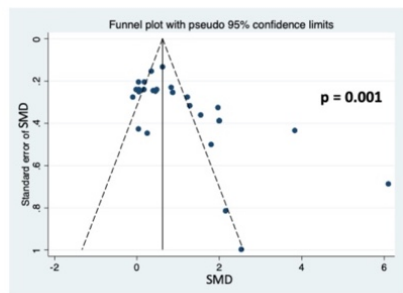

Fatigue

Normal Sleep

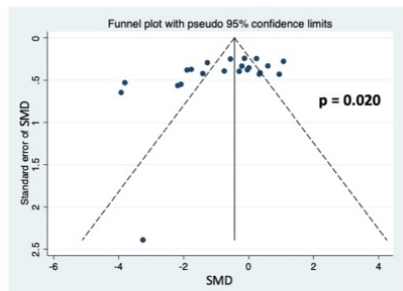

Figure S2. Publication bias in normal sleep.

Cognitive performance

Normal Sleep

| Study omitted           | Estimate  | [95% Conf. Interval] |
|-------------------------|-----------|----------------------|
| Petit et al., 2018      | .74375463 | -.43189207 1.0556272 |
| Romdhani et al., 2021   | .65924382 | -.33477163 .9837159  |
| Abdesselem et al., 2019 | .70954275 | -.37671140 1.0423741 |
| Hsouma et al., 2019     | .67925209 | -.34775278 1.0107514 |
| Hsouma et al., 2020a    | .72851104 | -.40435207 1.0526700 |
| Daaloui et al., 2020    | .72314674 | -.39456719 1.0517263 |
| Soussi et al., 2020     | .62997383 | -.33552870 .9244189  |
| Tanabe et al., 2020     | .66482997 | -.33993813 .9897217  |
| Hsouma et al., 2019     | .63504827 | -.32216755 .9479289  |
| Hsouma et al., 2020b    | .66007233 | -.33678821 .9823864  |
| Boukhris et al., 2020   | .70042694 | -.36952978 1.0313241 |
| Hsouma et al., 2019     | .61296946 | -.31379557 .9121433  |
| Romya et al., 2022      | .71205862 | -.38345098 1.0468718 |
| Tanabe et al., 2020     | .67885143 | -.35208920 1.0056137 |
| Boukhris et al., 2020   | .69182670 | -.36128178 1.0227315 |
| Romdhani et al., 2021   | .71725148 | -.37509557 1.0594975 |
| Tanabe et al., 2020     | .67896575 | -.35034215 1.0075893 |
| Romya et al., 2022      | .75798857 | -.45611396 1.0598632 |
| Combined                | .68762623 | -.37451298 1.0007395 |

Partial Sleep Deprivation

| Study omitted           | Estimate  | [95% Conf. Interval] |
|-------------------------|-----------|----------------------|
| Daaloui et al., 2019    | 1.7354630 | -.14201489 3.6129410 |
| Soussi et al., 2020     | -.3693747 | -.17604518 .9147946  |
| Romdhani et al., 2020   | 1.6651227 | -.01844214 3.3486876 |
| Brotherton et al., 2019 | 2.0493287 | -.48078953 4.5791740 |
| Ajijnapor et al., 2020  | 2.2384744 | -.0428931 4.4344597  |
| Romdhani et al., 2020   | 1.6874781 | -.00635041 3.3813064 |
| Combined                | 1.6690756 | .05431541 3.1638359  |

Physical performance

Normal Sleep

| Study omitted              | Estimate  | [95% Conf. Interval] |
|----------------------------|-----------|----------------------|
| Petit et al., 2018         | 1.0220410 | -.70848846 1.2593934 |
| Blanchfield et al., 2018   | 1.0247973 | -.70049113 1.3491036 |
| Romdhani et al., 2021      | 1.0217937 | -.67539100 1.3682064 |
| Hsouma et al., 2020a       | -.9794117 | -.65431225 1.3045112 |
| Boukhris et al., 2022      | -.9641198 | -.64464748 1.2835922 |
| Abdesselem et al., 2019    | 1.0167698 | -.68566346 1.3478761 |
| Boukhris et al., 2019      | 1.0175594 | -.68699752 1.3481213 |
| Hsouma et al., 2019        | -.9679903 | -.64554816 1.2904325 |
| Daaloui et al., 2019       | 1.0359577 | -.71103311 1.3668822 |
| Tanabe et al., 2020        | 1.0325074 | -.70509302 1.3599217 |
| Soussi et al., 2020        | -.9624084 | -.64158291 1.2832341 |
| Boukhris et al., 2019      | 1.0199052 | -.68944550 1.3501649 |
| Hsouma et al., 2020b       | -.9654805 | -.62953216 1.2618590 |
| Hsouma et al., 2019        | -.9484421 | -.63064304 1.2662213 |
| Hsouma et al., 2022        | -.8371625 | -.55931026 1.1514149 |
| Souabni et al., 2022       | -.9629048 | -.64443702 1.2813727 |
| Boukhris et al., 2020      | 1.0021118 | -.67066705 1.3335567 |
| Hsouma et al., 2019        | -.9483552 | -.63102049 1.2446050 |
| Boukhris et al., 2022      | -.8634183 | -.57635587 1.1504809 |
| Boukhris et al., 2019      | -.8994243 | -.66951174 1.3293370 |
| Romya et al., 2022         | 1.0344927 | -.70618446 1.3628010 |
| Tanabe et al., 2020        | 1.0347646 | -.70838070 1.3611486 |
| Romdhani et al., 2021      | 1.0288820 | -.68993306 1.3678309 |
| Tanabe et al., 2020        | 1.0284248 | -.69925860 1.3573327 |
| Boukhris et al., 2020      | -.9821641 | -.65587354 1.3084548 |
| Romya et al., 2022         | 1.0300840 | -.69939899 1.3608591 |
| Yamamoto and Hayashi, 2006 | 1.0170815 | -.69231588 1.3418471 |
| Combined                   | -.9897622 | -.67263974 1.3068847 |

Partial Sleep Deprivation

| Study omitted           | Estimate  | [95% Conf. Interval] |
|-------------------------|-----------|----------------------|
| Daaloui et al., 2019    | 1.0224291 | -.88049977 1.4643874 |
| Soussi et al., 2020     | -.8159581 | -.41166955 1.2202467 |
| Hammouda et al., 2018   | 1.0128056 | -.46149281 1.5641783 |
| Romdhani et al., 2020   | -.9400130 | -.50722873 1.4128373 |
| Brotherton et al., 2019 | 1.0433985 | -.57561189 1.5110050 |
| Ajijnapor et al., 2020  | -.7823507 | -.39615786 1.1693436 |
| Hammouda et al., 2018   | -.8639219 | -.43599759 1.2918459 |
| Romdhani et al., 2020   | -.8091117 | -.40931210 1.2089113 |
| Combined                | -.9106002 | -.50631926 1.3148812 |

Fatigue

Normal Sleep

| Study omitted              | Estimate   | [95% Conf. Interval]  |
|----------------------------|------------|-----------------------|
| Blanchfield et al., 2018   | -.81146365 | -.13101766 -.3127507  |
| Petit et al., 2018         | -.79953253 | -.13044534 -.2946116  |
| Abdesselem et al., 2019    | -.78974807 | -.12975810 -.2819151  |
| Boukhris et al., 2019      | -.81524789 | -.13240739 -.3064218  |
| Boukhris et al., 2022      | -.84747899 | -.13201568 -.3748010  |
| Hsouma et al., 2019        | -.70488658 | -.11938279 -.2159492  |
| Hsouma et al., 2020a       | -.82733893 | -.13232582 -.3314198  |
| Daaloui et al., 2019       | -.78379631 | -.12879728 -.2796200  |
| Soussi et al., 2020        | -.6192872  | -.10789849 -.1608805  |
| Boukhris et al., 2019      | -.79809701 | -.13160161 -.2801779  |
| Hsouma et al., 2019        | -.69758785 | -.11834369 -.2117388  |
| Hsouma et al., 2020b       | -.73257267 | -.12339967 -.2311487  |
| Boukhris et al., 2020      | -.76081687 | -.12645259 -.2571078  |
| Hsouma et al., 2022        | -.73503566 | -.12120797 -.2509915  |
| Souabni et al., 2022       | -.79448465 | -.13004365 -.2925328  |
| Boukhris et al., 2019      | -.77520263 | -.12935959 -.2568092  |
| Boukhris et al., 2022      | -.69744443 | -.11844063 -.2094826  |
| Hsouma et al., 2019        | -.60640066 | -.10517306 -.1602707  |
| Romya et al., 2022         | -.81327611 | -.13121651 -.3143871  |
| Boukhris et al., 2020      | -.72610799 | -.12224993 -.2301167  |
| Romya et al., 2022         | -.83827037 | -.13277739 -.3487668  |
| Yamamoto and Hayashi, 2006 | -.69311404 | -.11793623 -.20466577 |
| Combined                   | -.75734408 | -.12394554 -.2752327  |

Partial Sleep Deprivation

| Study omitted           | Estimate   | [95% Conf. Interval]  |
|-------------------------|------------|-----------------------|
| Daaloui et al., 2019    | -1.0607325 | -.27079985 -.0416658  |
| Soussi et al., 2020     | -.8623781  | -.44457133 -.07908299 |
| Brotherton et al., 2019 | -.11693966 | -.21467412 -.00794795 |
| Romdhani et al., 2020   | -.11461543 | -.21260092 -.16629930 |
| Romdhani et al., 2020   | -.8890058  | -.13593190 -.01865280 |
| Ajijnapor et al., 2020  | -.12085466 | -.22654343 -.15165907 |
| Combined                | -.86317668 | -.17961019 -.12025202 |

Figure S3. Sensitivity analyses in normal sleep and partial sleep-deprived conditions.



### Meta-Regression

For studies in a normal sleep condition, random effects (Sidik-Jonkman method) meta-regression models were used to examine whether trial-level covariates (mean age of participants – ranging from 18.3 to 35.0 years—, nap duration – ranging from 10 to 120—, and time from nap awakening to test – ranging from 15 to 270 min) influenced heterogeneity.

Meta-regression was not performed with studies in a partial sleep deprivation condition because this method is not recommended when fewer than 10 studies are available.

Because of the small number of studies, multivariate meta-regression models were not recommended. Thus, univariate meta-regression models were estimated, as with any linear regression model, to estimate the proportion of between-trial heterogeneity explained by the model, as well as the change in the effect size estimate for each 1-unit change in the characteristic included as a predictor in the model.

The variability explained by each model was tested using the Wald test, and residual heterogeneity estimates ( $\tau$ ,  $\tau^2$ ,  $I^2$ ,  $H^2$ ) were also calculated for each model. The normality assumption for meta-regression was checked using bubble plots and residual value Q-Q, as presented in the following pages.

Outcome: **Cognitive performance**  
Covariate: age (years)

### Fixed and Random Effects

|                                    | Q      | df | p      |
|------------------------------------|--------|----|--------|
| Omnibus test of Model Coefficients | 0.722  | 1  | 0.396  |
| Test of Residual Heterogeneity     | 59.727 | 16 | < .001 |

Note. *p*-values are approximate.

Note. The model was estimated using Restricted ML method.

### Coefficients

|           | Estimate | Standard Error | z      | p     |
|-----------|----------|----------------|--------|-------|
| intercept | -1.855   | 2.999          | -0.619 | 0.536 |
| edadcont  | 0.122    | 0.144          | 0.850  | 0.396 |

Note. Wald test.

### Residual Heterogeneity Estimates

|           | Estimate |
|-----------|----------|
| $\tau^2$  | 0.318    |
| $\tau$    | 0.564    |
| $I^2$ (%) | 71.599   |
| $H^2$     | 3.521    |

### Diagnostic Plots

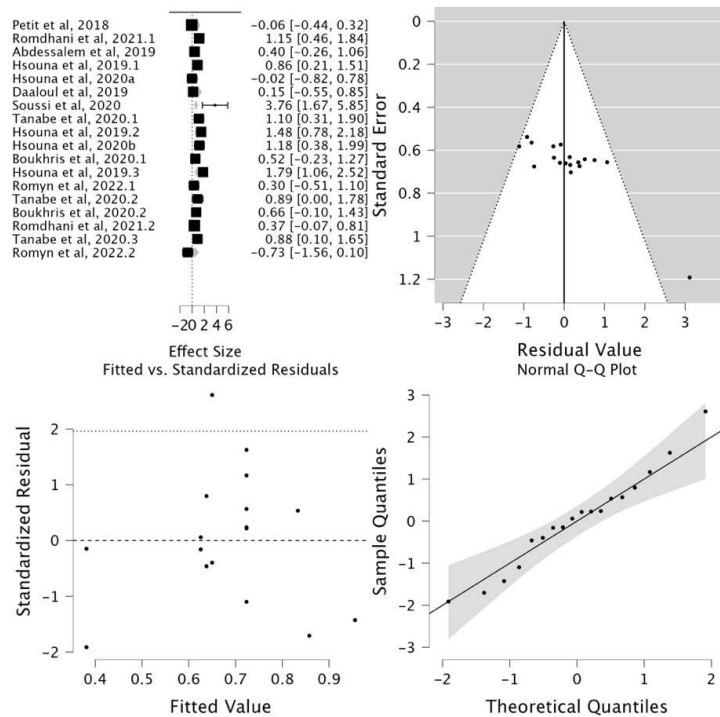

**Covariate: nap duration (min)**

**Fixed and Random Effects**

|                                    | Q      | df | p      |
|------------------------------------|--------|----|--------|
| Omnibus test of Model Coefficients | 1.705  | 1  | 0.192  |
| Test of Residual Heterogeneity     | 58.534 | 16 | < .001 |

Note. *p* -values are approximate.

Note. The model was estimated using Restricted ML method.

**Coefficients**

|           | Estimate | Standard Error | z      | p      |
|-----------|----------|----------------|--------|--------|
| intercept | 1.027    | 0.305          | 3.366  | < .001 |
| napdur    | -0.007   | 0.005          | -1.306 | 0.192  |

Note. Wald test.

**Residual Heterogeneity Estimates**

|           | Estimate |
|-----------|----------|
| $\tau^2$  | 0.302    |
| $\tau$    | 0.550    |
| $I^2$ (%) | 70.333   |
| $H^2$     | 3.371    |

**Diagnostic Plots**

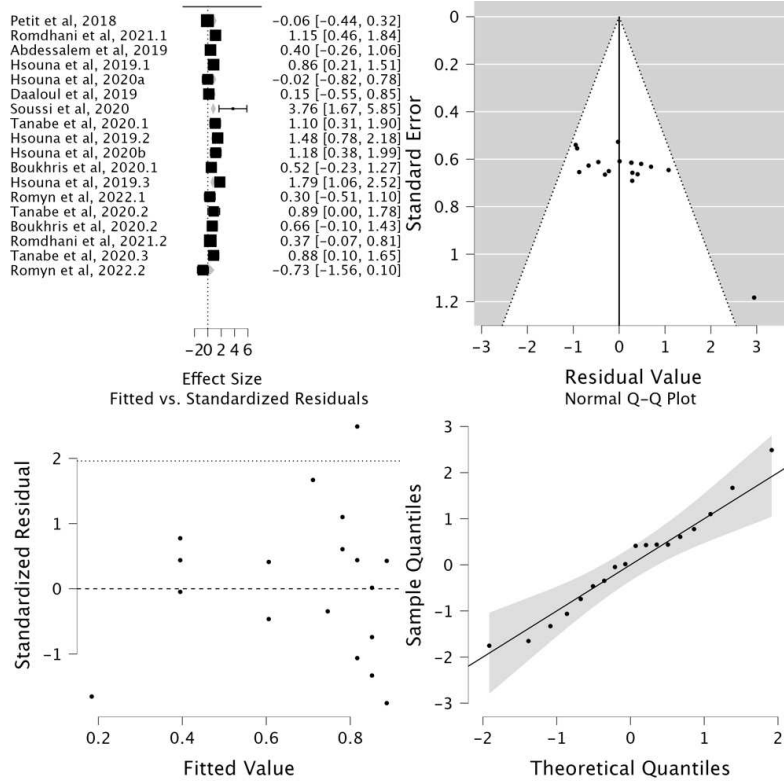

**Covariate: time from nap awakening to test (min)**

**Fixed and Random Effects**

|                                    | Q      | df | p      |
|------------------------------------|--------|----|--------|
| Omnibus test of Model Coefficients | 4.063  | 1  | 0.044  |
| Test of Residual Heterogeneity     | 56.042 | 16 | < .001 |

Note. *p*-values are approximate.

Note. The model was estimated using Restricted ML method.

**Coefficients**

|           | Estimate | Standard Error | z     | p     |
|-----------|----------|----------------|-------|-------|
| intercept | 0.172    | 0.299          | 0.576 | 0.564 |
| washout   | 0.005    | 0.003          | 2.016 | 0.044 |

Note. Wald test.

**Residual Heterogeneity Estimates**

|           | Estimate |
|-----------|----------|
| $\tau^2$  | 0.289    |
| $\tau$    | 0.537    |
| $I^2$ (%) | 69.760   |
| $H^2$     | 3.307    |

**Diagnostic Plots**

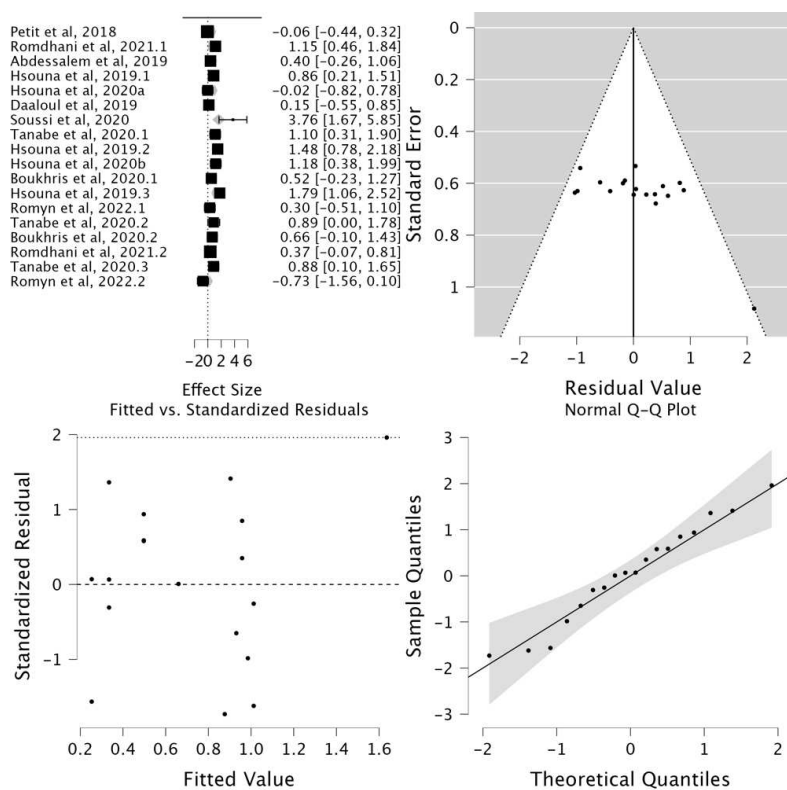

Outcome: Physical performance

Covariate: age (years)

**Fixed and Random Effects**

|                                    | Q       | df | p      |
|------------------------------------|---------|----|--------|
| Omnibus test of Model Coefficients | 0.023   | 1  | 0.880  |
| Test of Residual Heterogeneity     | 238.659 | 25 | < .001 |

Note. p-values are approximate.

Note. The model was estimated using Restricted ML method.

**Coefficients**

|           | Estimate | Standard Error | z     | p     |
|-----------|----------|----------------|-------|-------|
| intercept | 0.792    | 1.850          | 0.428 | 0.668 |
| edadcont  | 0.013    | 0.085          | 0.151 | 0.880 |

Note. Wald test.

**Residual Heterogeneity Estimates**

|           | Estimate |
|-----------|----------|
| $\tau^2$  | 1.528    |
| $\tau$    | 1.236    |
| $I^2$ (%) | 95.620   |
| $H^2$     | 22.832   |

**Diagnostic Plots**

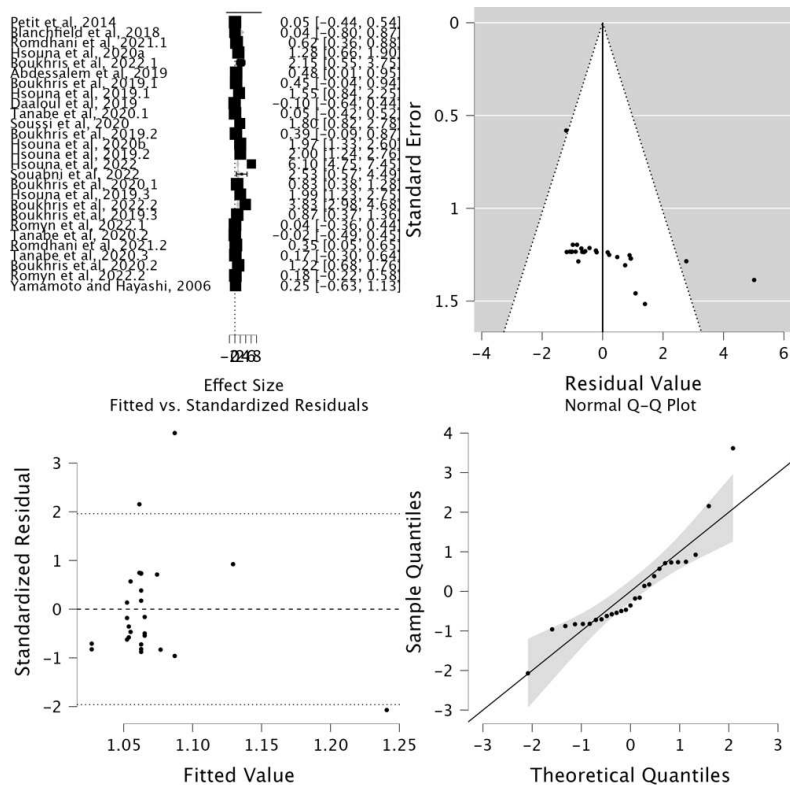

Covariate: nap duration (min)

**Fixed and Random Effects**

|                                    | Q       | df | p      |
|------------------------------------|---------|----|--------|
| Omnibus test of Model Coefficients | 0.320   | 1  | 0.572  |
| Test of Residual Heterogeneity     | 232.809 | 25 | < .001 |

Note. p-values are approximate.

Note. The model was estimated using Restricted ML method.

**Coefficients**

|           | Estimate | Standard Error | z      | p     |
|-----------|----------|----------------|--------|-------|
| intercept | 1.296    | 0.474          | 2.733  | 0.006 |
| napdur    | -0.005   | 0.009          | -0.565 | 0.572 |

Note. Wald test.

**Residual Heterogeneity Estimates**

|           | Estimate |
|-----------|----------|
| $\tau^2$  | 1.510    |
| $\tau$    | 1.229    |
| $I^2$ (%) | 95.345   |
| $H^2$     | 21.480   |

**Diagnostic Plots**

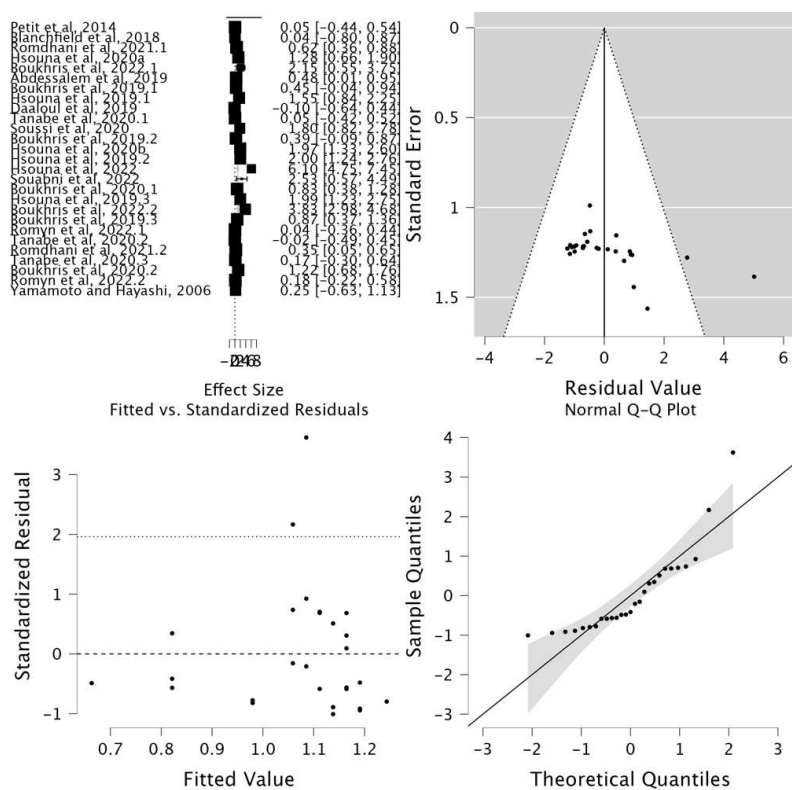

Covariate: time from nap awakening to test (min)

**Fixed and Random Effects**

|                                    | Q       | df | p      |
|------------------------------------|---------|----|--------|
| Omnibus test of Model Coefficients | 8.241   | 1  | 0.004  |
| Test of Residual Heterogeneity     | 183.417 | 25 | < .001 |

Note. p-values are approximate.

Note. The model was estimated using Restricted ML method.

**Coefficients**

|           | Estimate | Standard Error | z      | p     |
|-----------|----------|----------------|--------|-------|
| intercept | -0.006   | 0.422          | -0.015 | 0.988 |
| washout   | 0.010    | 0.003          | 2.871  | 0.004 |

Note. Wald test.

**Residual Heterogeneity Estimates**

|           | Estimate |
|-----------|----------|
| $\tau^2$  | 1.058    |
| $\tau$    | 1.029    |
| $I^2$ (%) | 93.601   |
| $H^2$     | 15.628   |

**Diagnostic Plots**

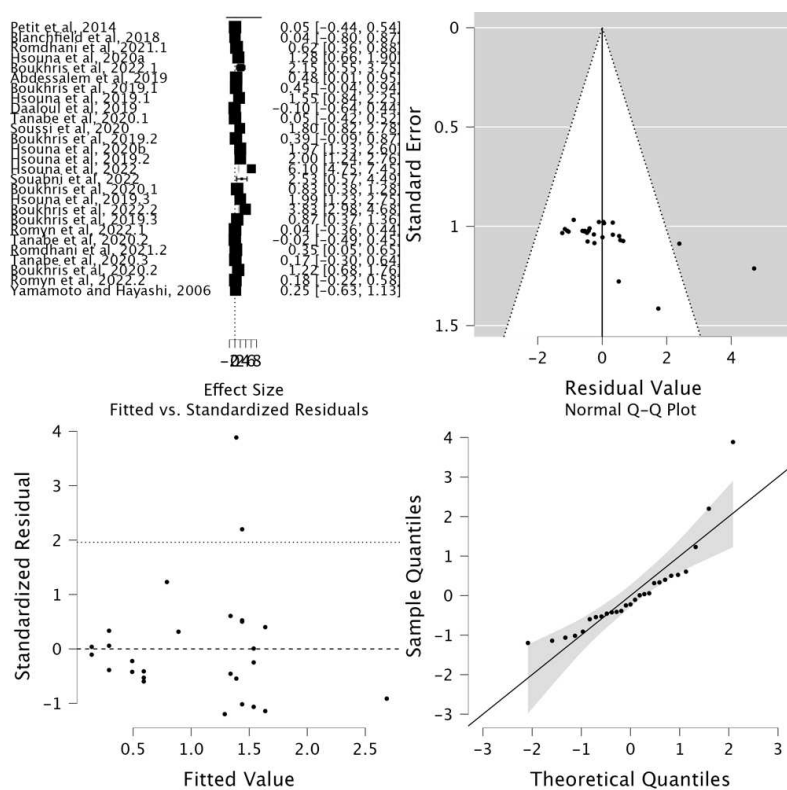

Outcome: **Fatigue**  
 Covariate: **age (years)**

**Fixed and Random Effects**

|                                    | Q       | df | p      |
|------------------------------------|---------|----|--------|
| Omnibus test of Model Coefficients | 0.487   | 1  | 0.485  |
| Test of Residual Heterogeneity     | 197.668 | 20 | < .001 |

Note. *p* -values are approximate.

Note. The model was estimated using Restricted ML method.

**Coefficients**

|           | Estimate | Standard Error | z      | p     |
|-----------|----------|----------------|--------|-------|
| intercept | -2.143   | 1.970          | -1.088 | 0.277 |
| edadcont  | 0.062    | 0.089          | 0.698  | 0.485 |

Note. Wald test.

**Residual Heterogeneity Estimates**

|           | Estimate |
|-----------|----------|
| $\tau^2$  | 1.697    |
| $\tau$    | 1.303    |
| $I^2$ (%) | 92.856   |
| $H^2$     | 13.997   |

**Diagnostic Plots**

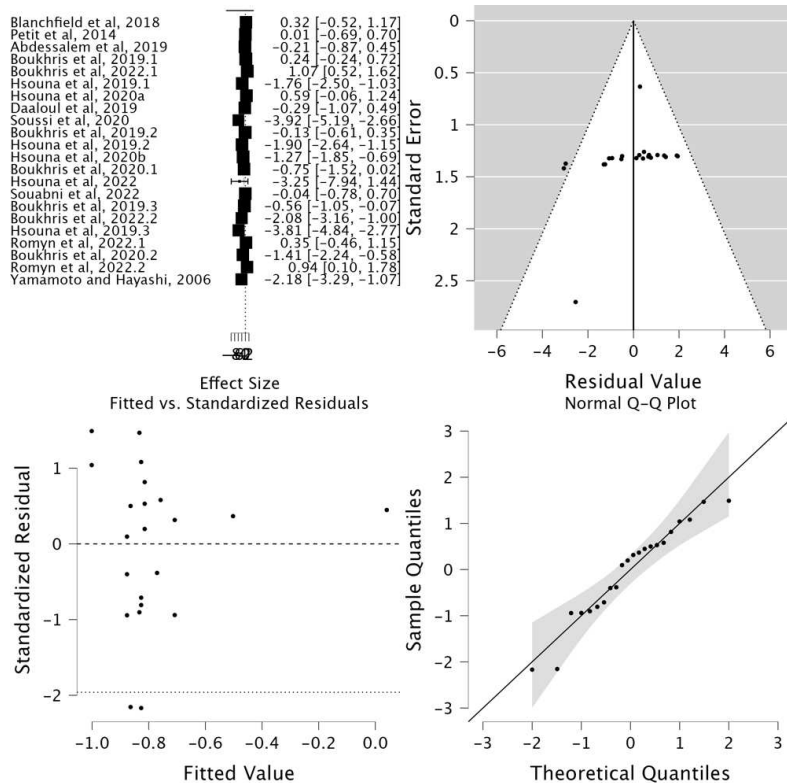



**Covariate: nap duration (min)**

**Fixed and Random Effects**

|                                    | Q       | df | p      |
|------------------------------------|---------|----|--------|
| Omnibus test of Model Coefficients | 0.250   | 1  | 0.617  |
| Test of Residual Heterogeneity     | 199.523 | 20 | < .001 |

Note. *p* -values are approximate.

Note. The model was estimated using Restricted ML method.

**Coefficients**

|           | Estimate | Standard Error | z      | p     |
|-----------|----------|----------------|--------|-------|
| intercept | -1.027   | 0.569          | -1.803 | 0.071 |
| napdur    | 0.006    | 0.012          | 0.500  | 0.617 |

Note. Wald test.

**Residual Heterogeneity Estimates**

|           | Estimate |
|-----------|----------|
| $\tau^2$  | 1.725    |
| $\tau$    | 1.313    |
| $I^2$ (%) | 92.938   |
| $H^2$     | 14.160   |

**Diagnostic Plots**

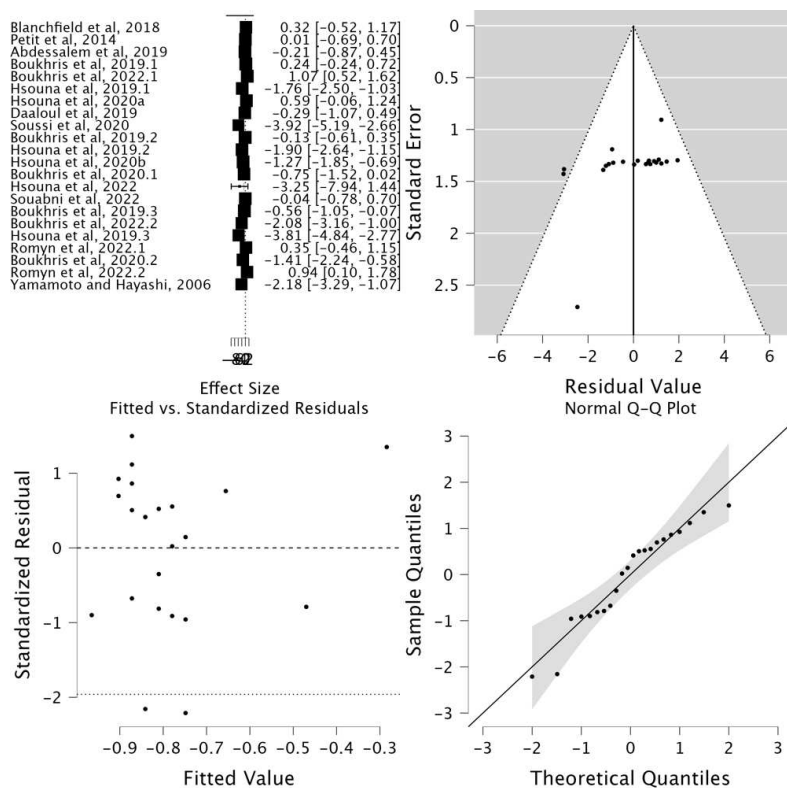

Covariate: time from nap awakening to test (min)

**Fixed and Random Effects**

|                                    | Q       | df | p      |
|------------------------------------|---------|----|--------|
| Omnibus test of Model Coefficients | 3.854   | 1  | 0.050  |
| Test of Residual Heterogeneity     | 191.116 | 20 | < .001 |

Note. p-values are approximate.

Note. The model was estimated using Restricted ML method.

**Coefficients**

|           | Estimate | Standard Error | z      | p     |
|-----------|----------|----------------|--------|-------|
| intercept | 0.334    | 0.628          | 0.532  | 0.595 |
| washout   | -0.009   | 0.005          | -1.963 | 0.050 |

Note. Wald test.

**Residual Heterogeneity Estimates**

|           | Estimate |
|-----------|----------|
| $\tau^2$  | 1.452    |
| $\tau$    | 1.205    |
| $I^2$ (%) | 91.718   |
| $H^2$     | 12.074   |

**Diagnostic Plots**

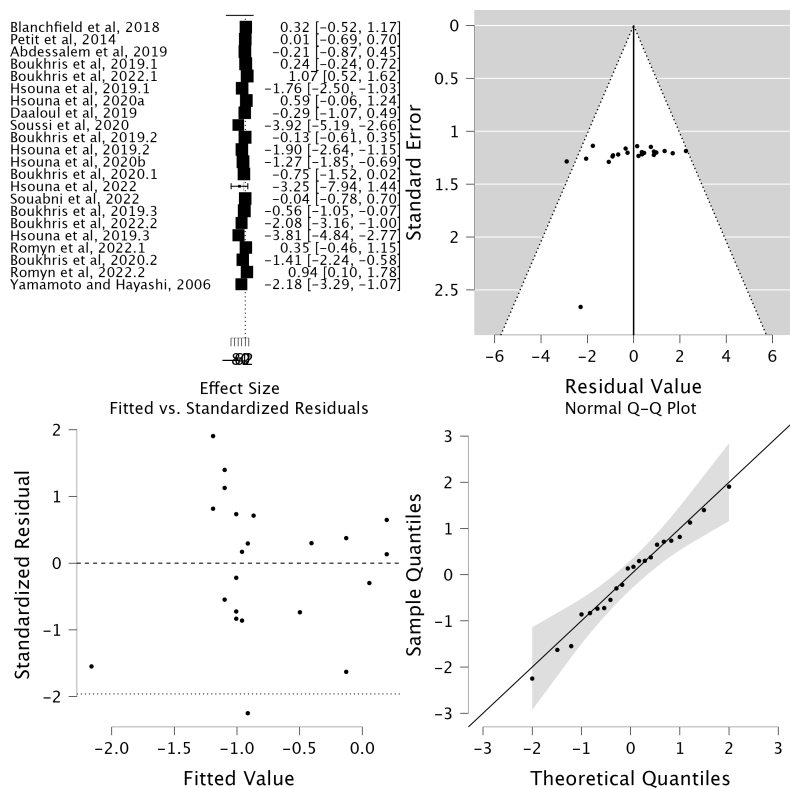

Supplement: bjsports-2022-106355supp001_data_supplement.pdf [file bjsports-2022-106355supp001_data_supplement.pdf]
